# Supplementary material
Source: MDPI journal article supplement (https://www.mdpi.com/2073-4433/14/12/1833)
Supplement: s1 [file s1]

## Supplementary Material

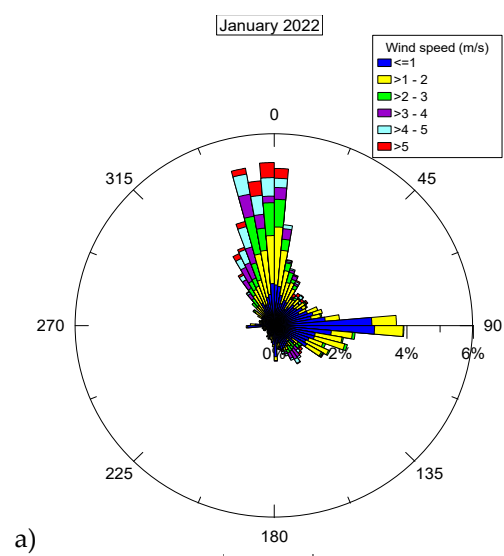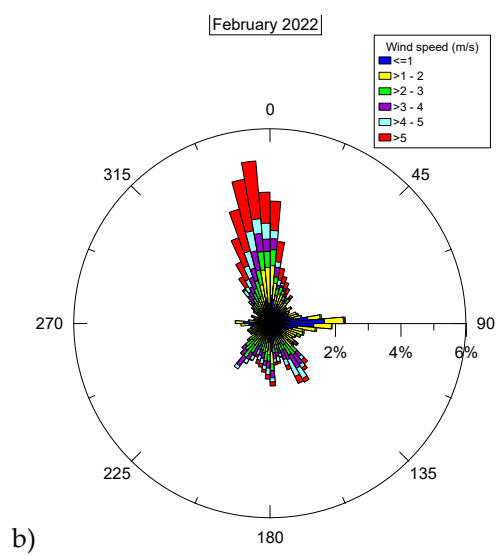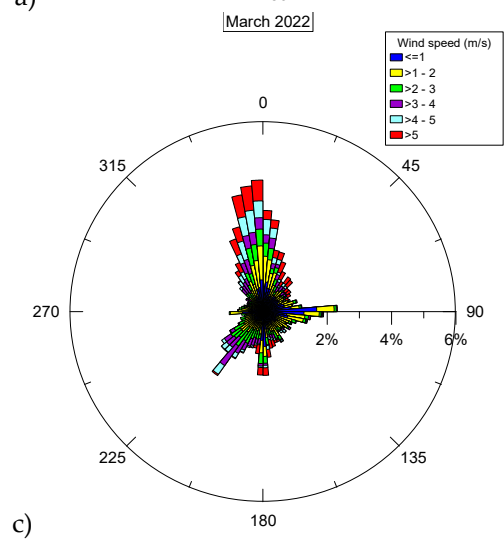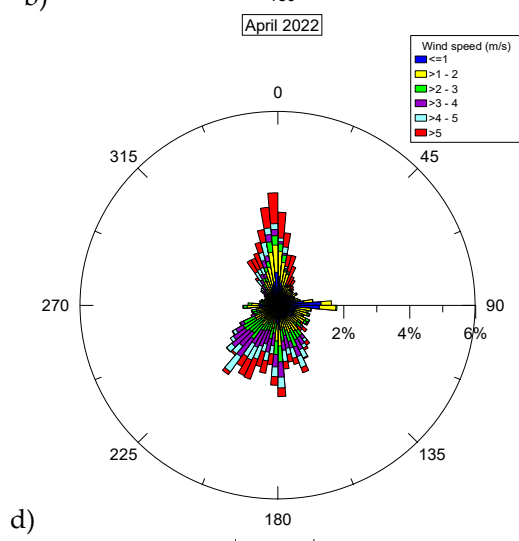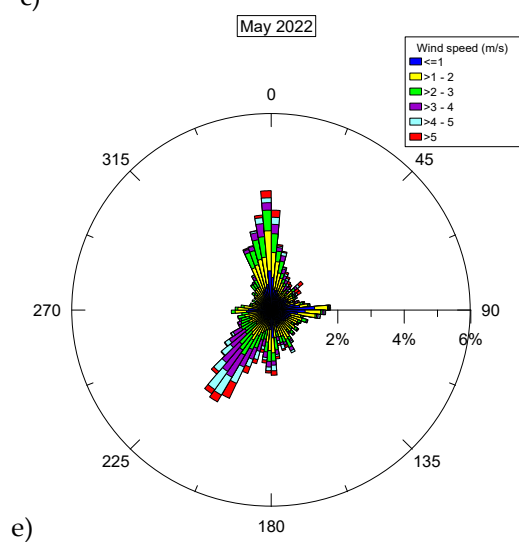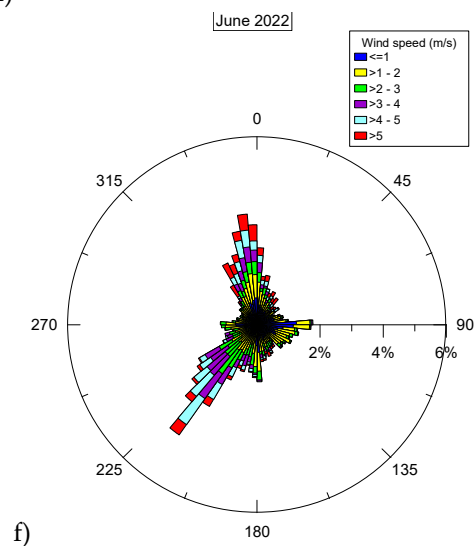

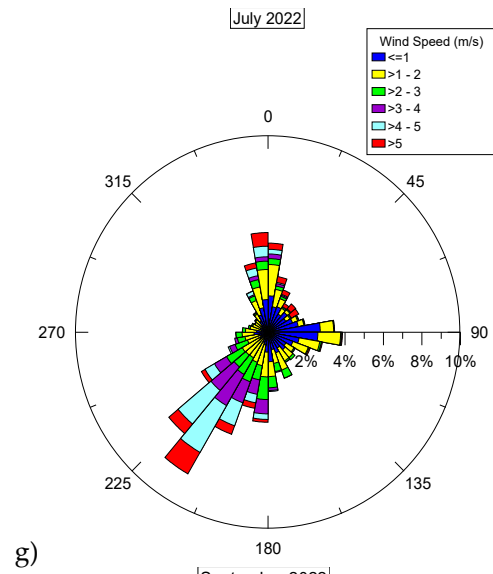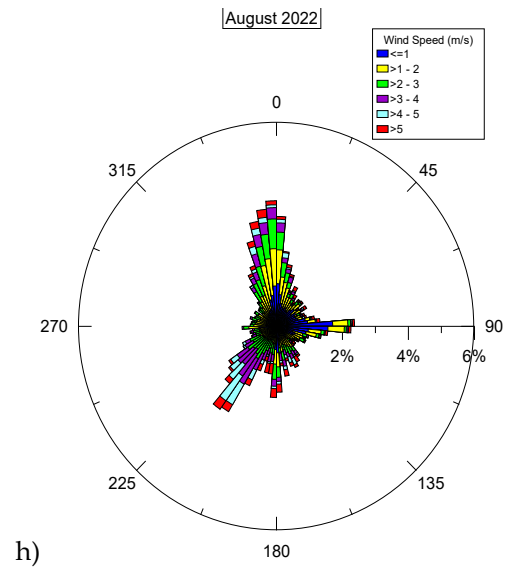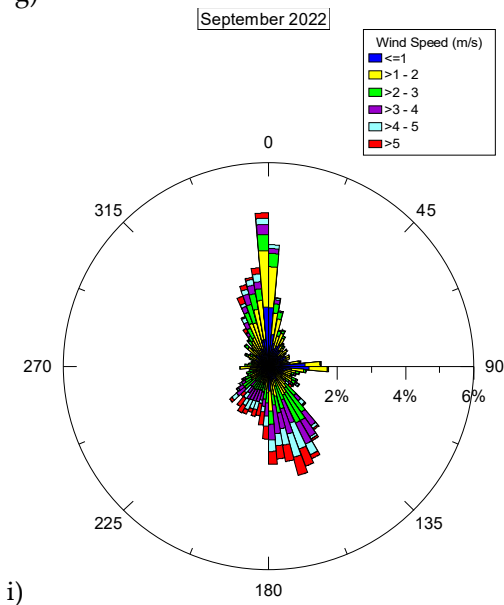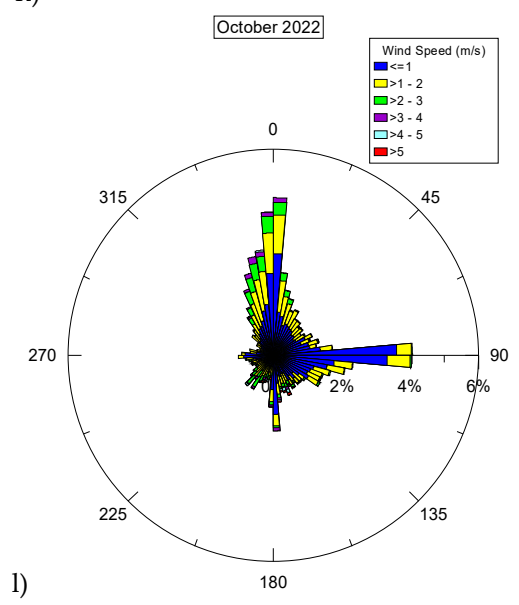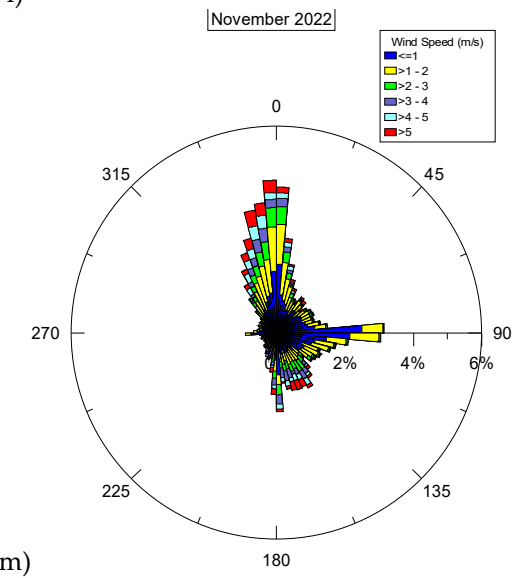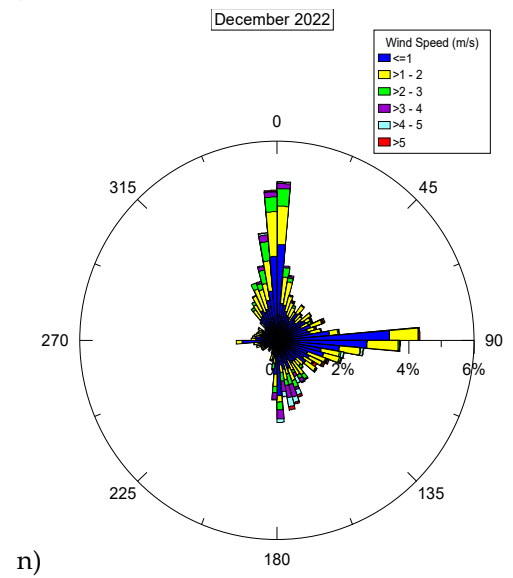

Figure S1. Wind roses of the period investigated plotted on a monthly basis.

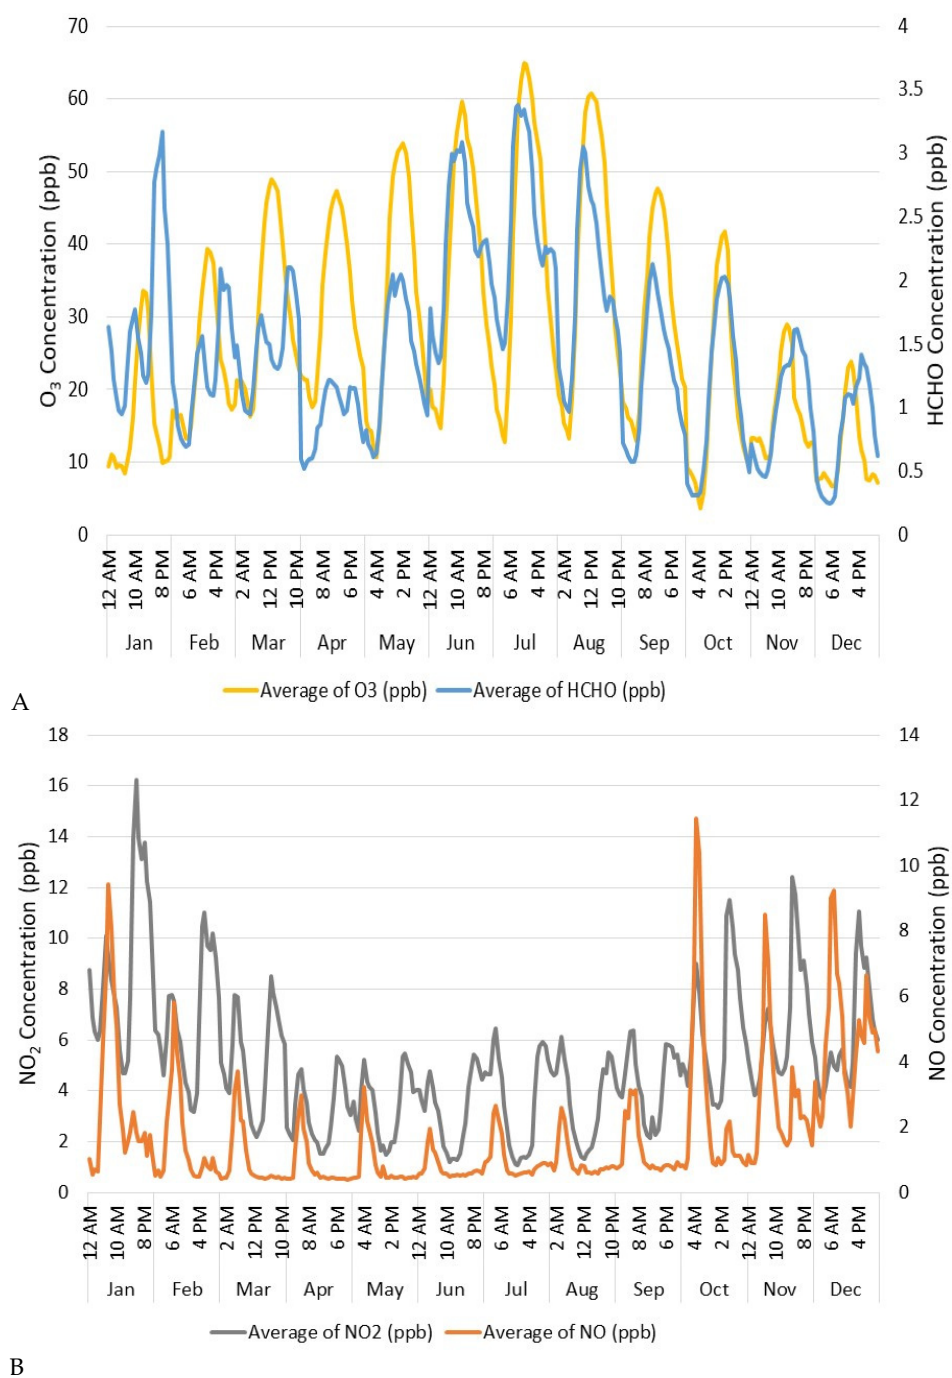

**Figure S2.** Diurnal variations of the pollutants measured monthly: above HCHO vs  $O_3$ , below  $NO_2$  vs NO.

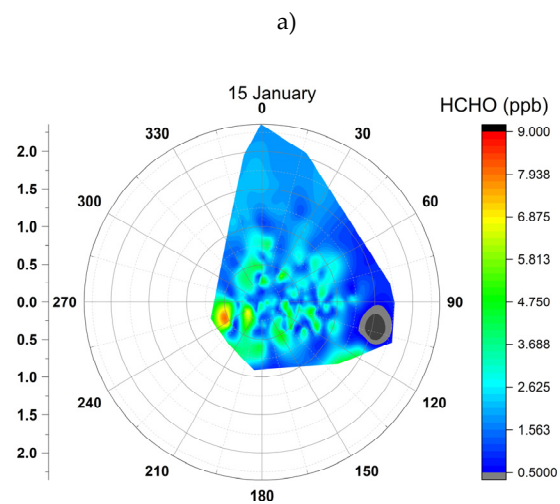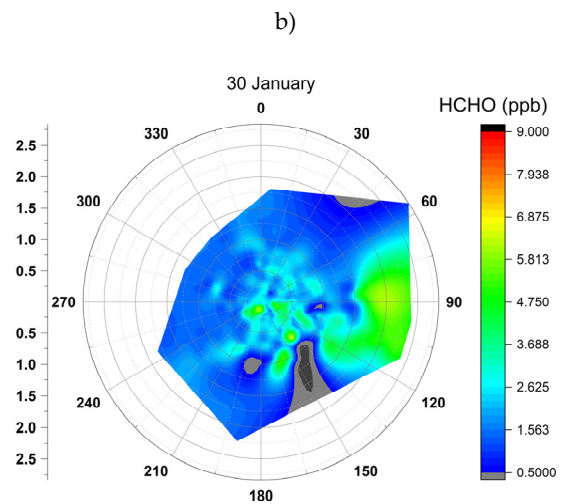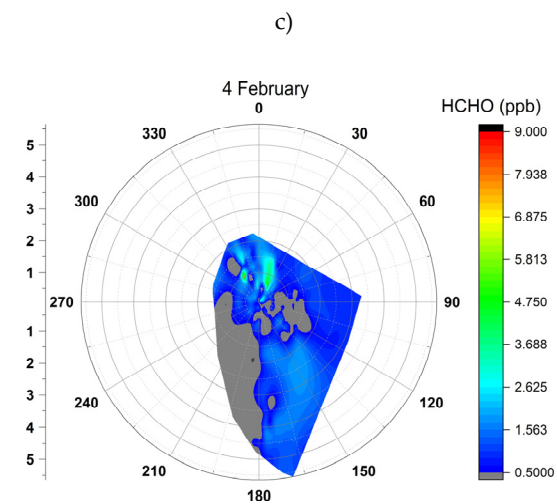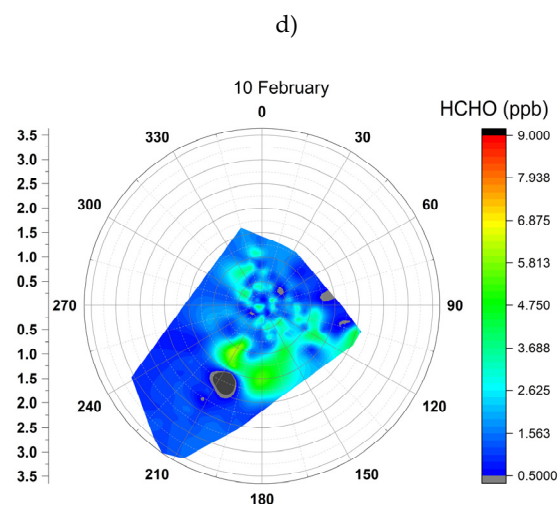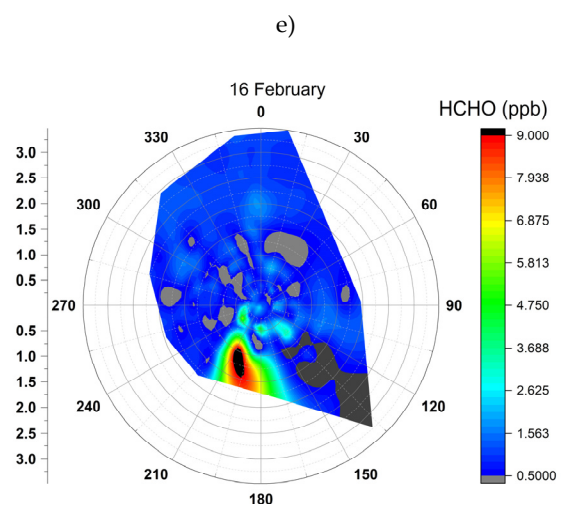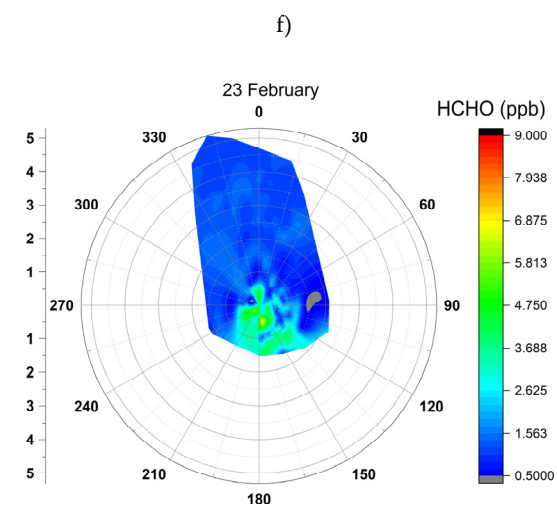



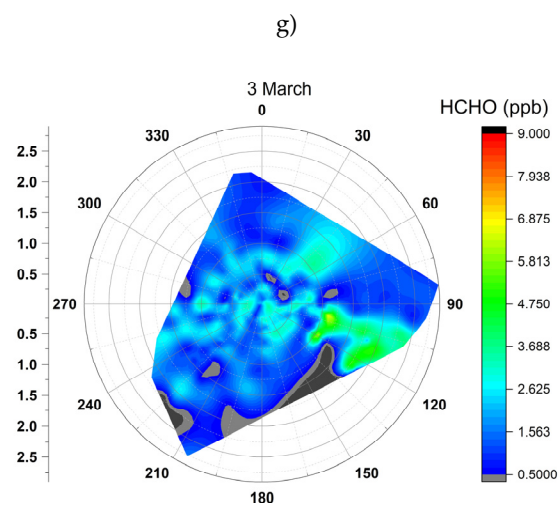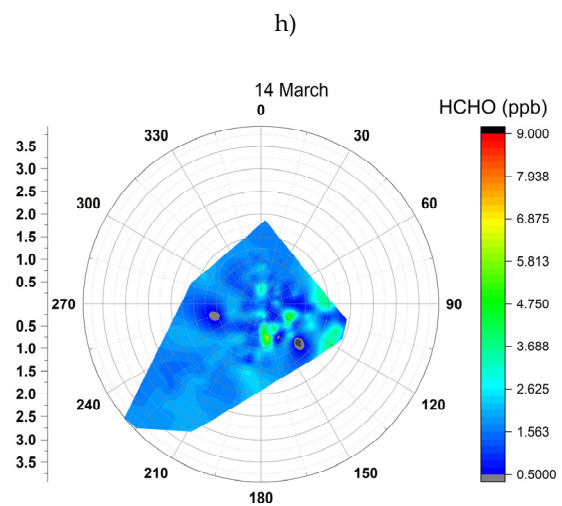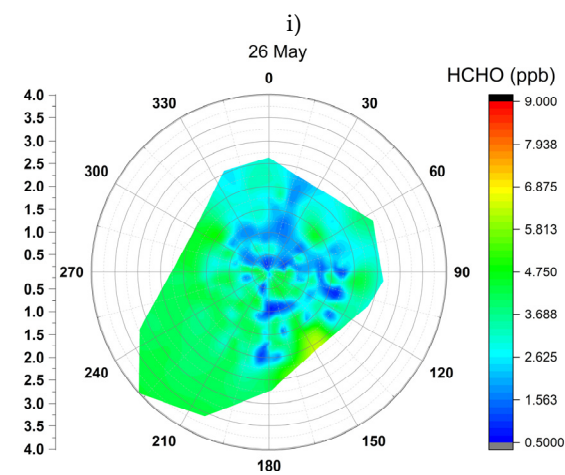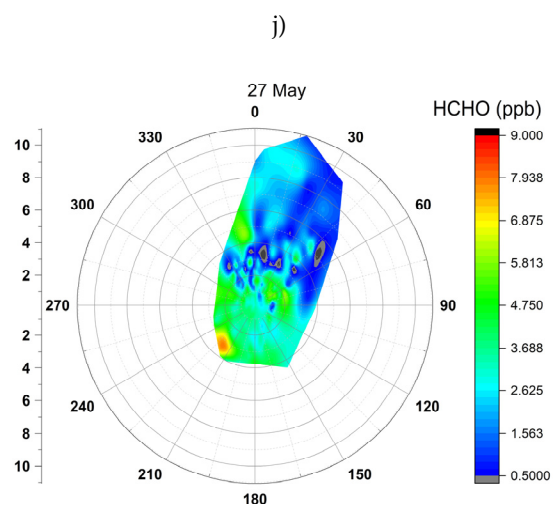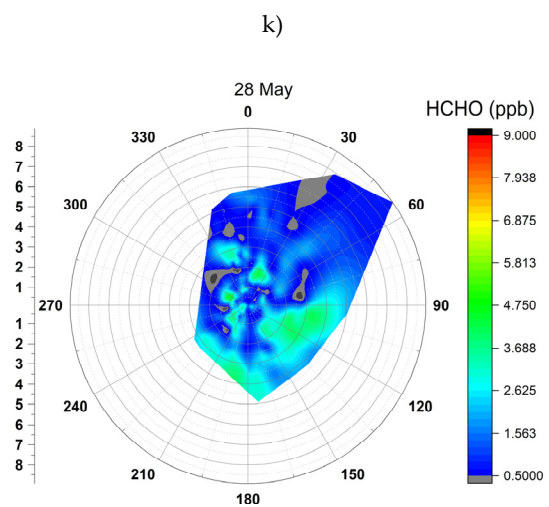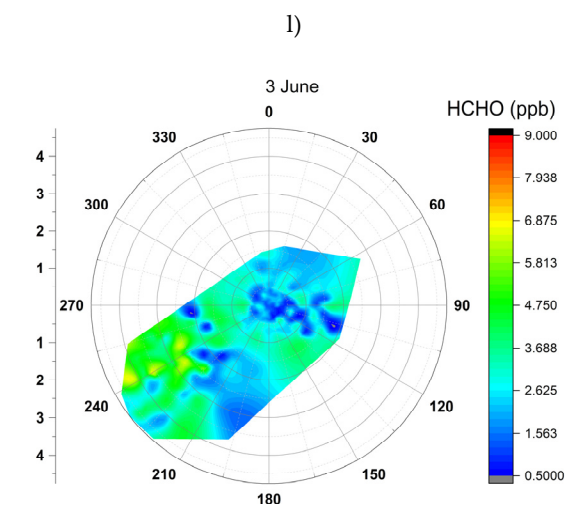

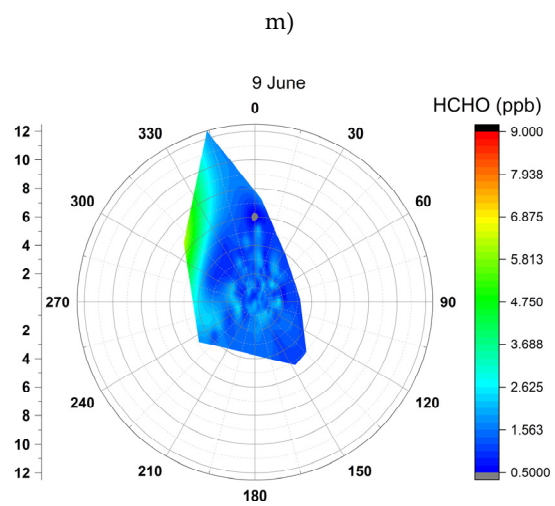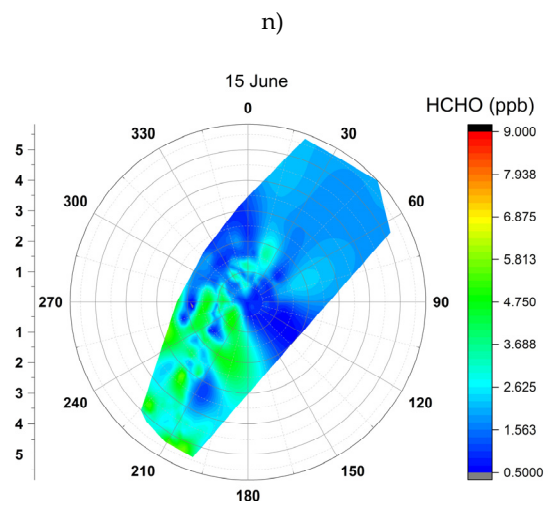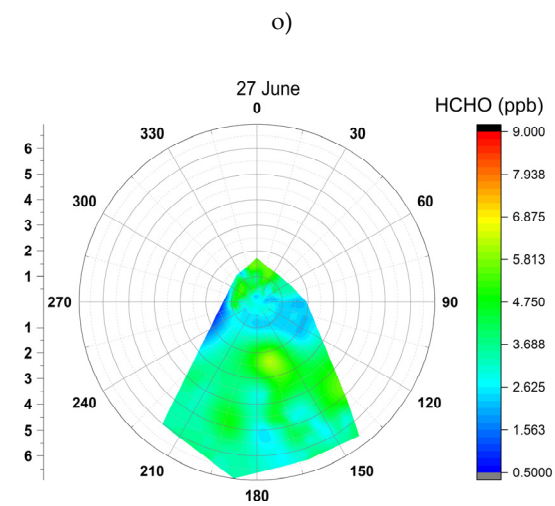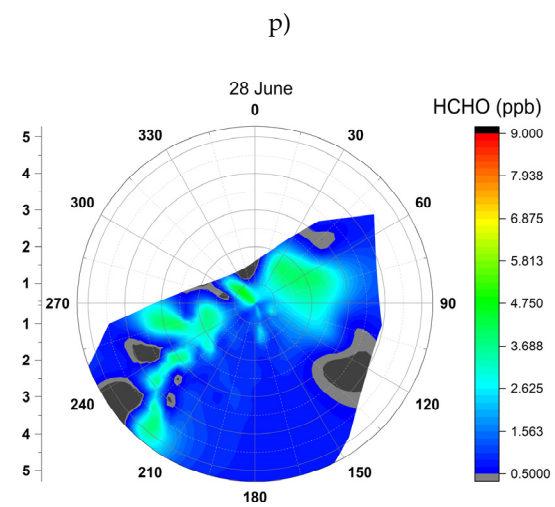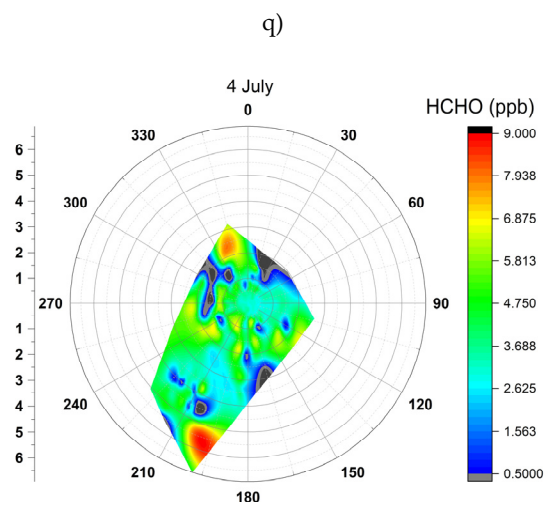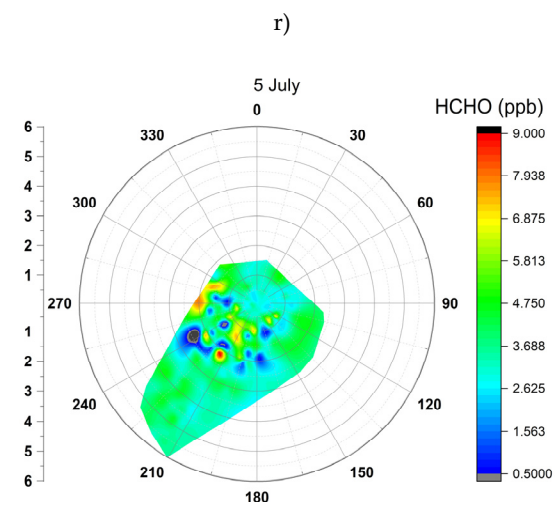

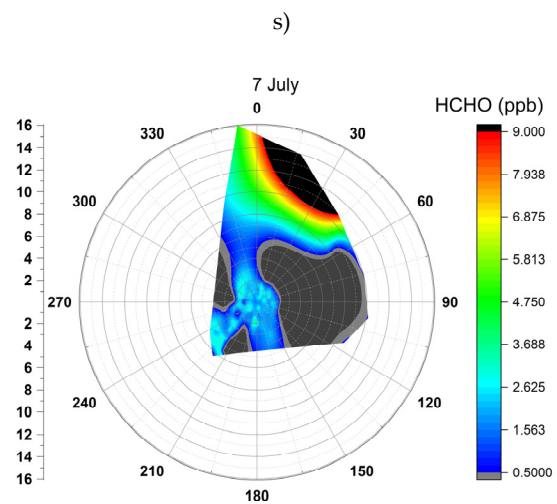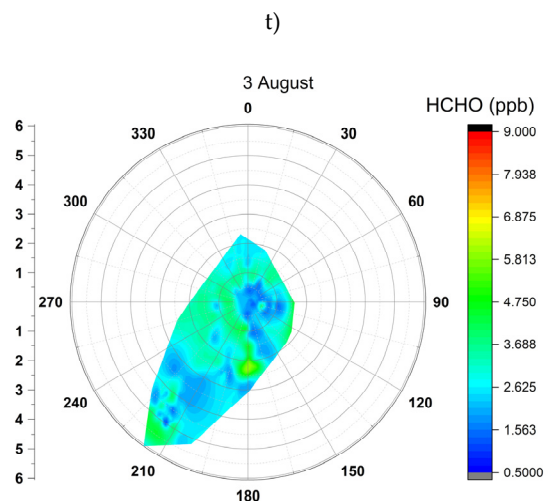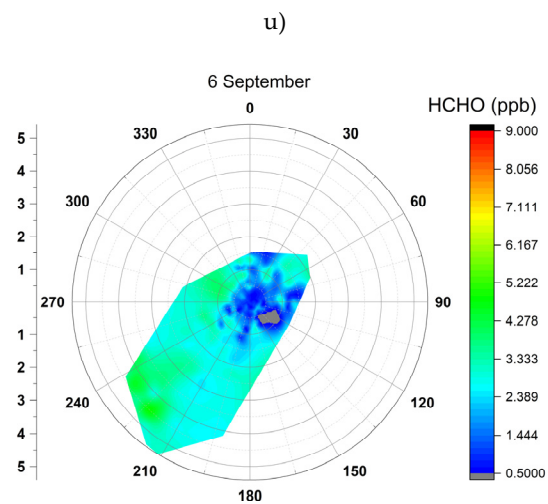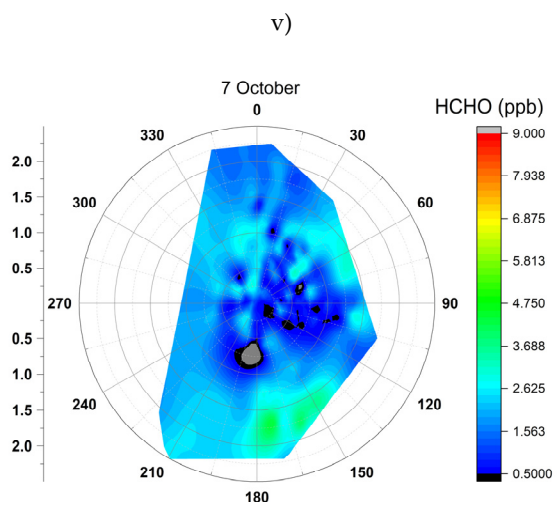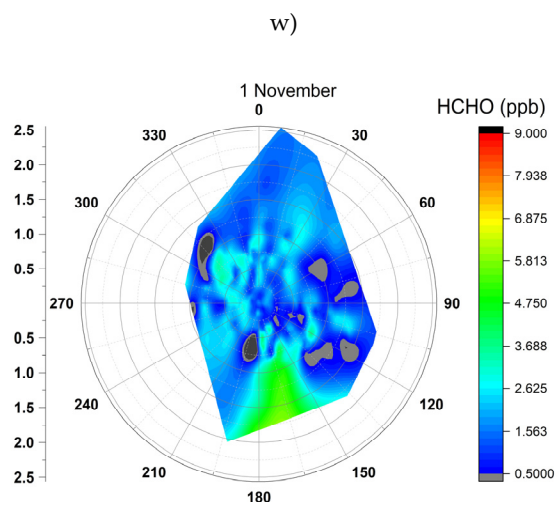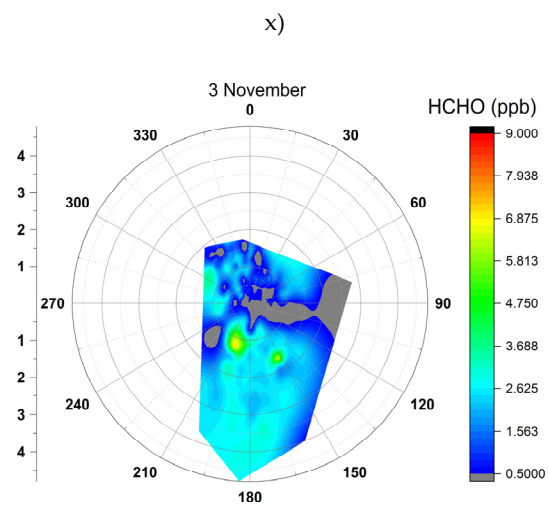

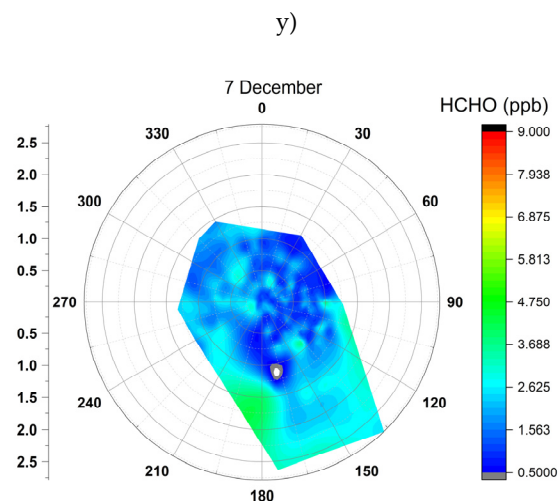

**Figure S3.** Bivariate polar plots of the days with HCHO peak occurrence vs wind data (on left axis windspeed in m/s).

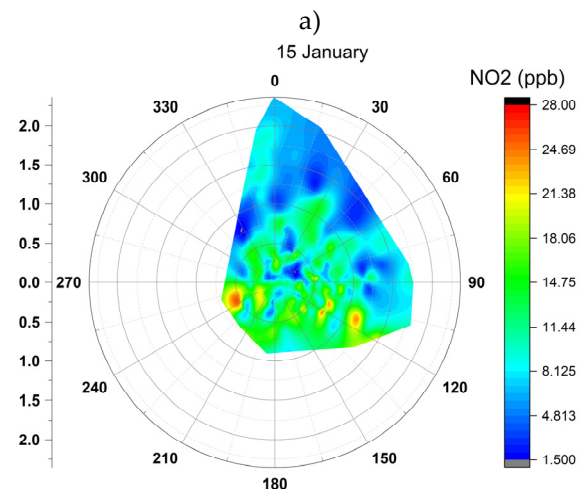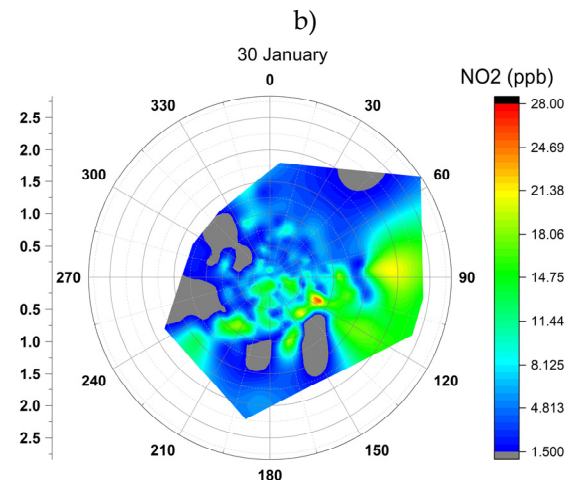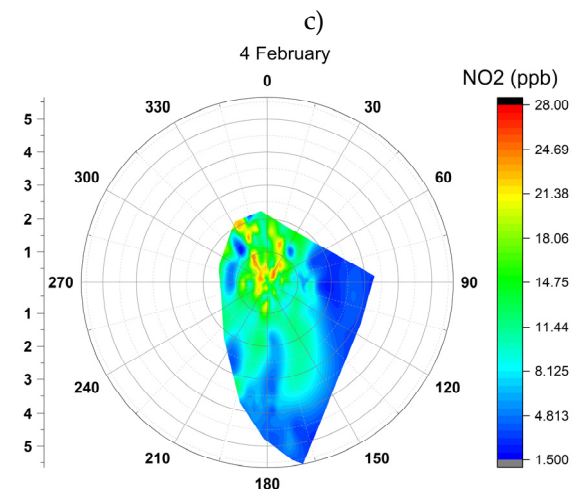



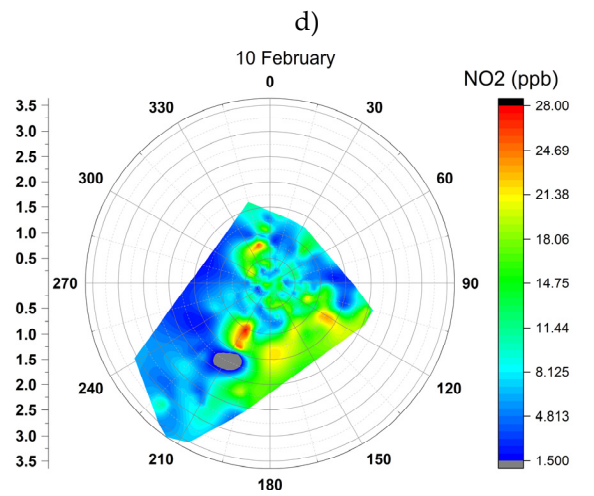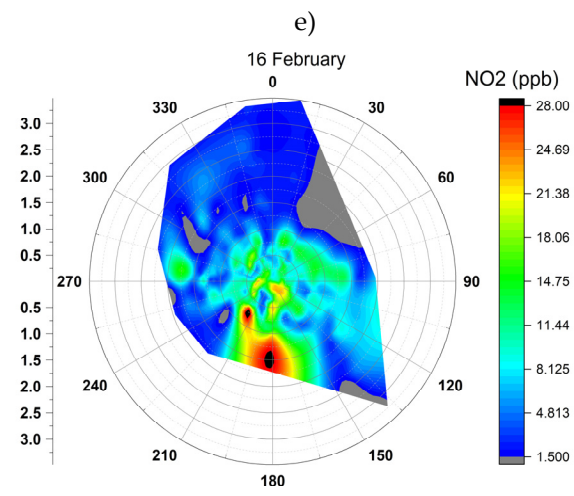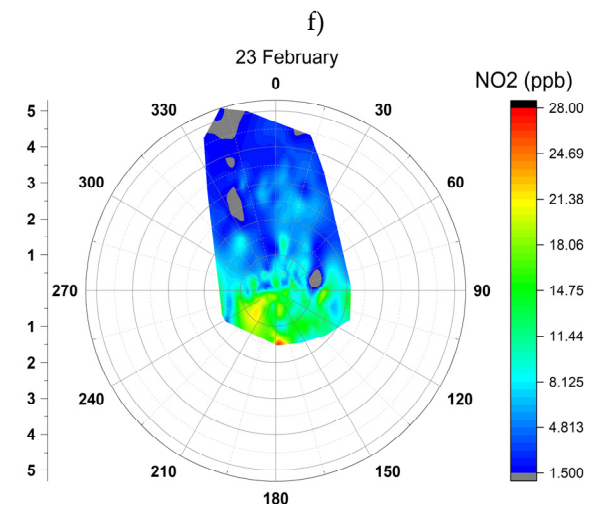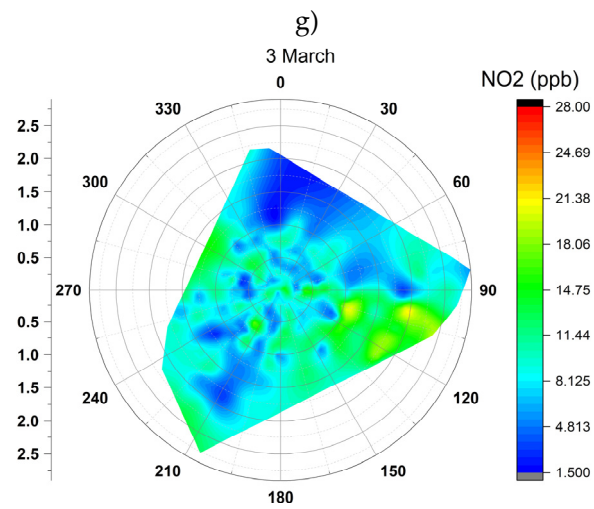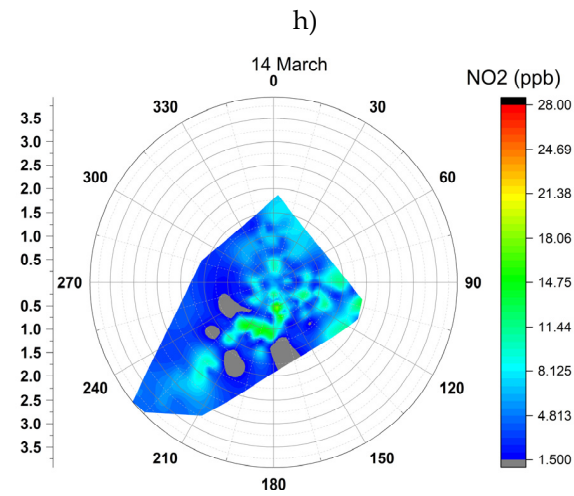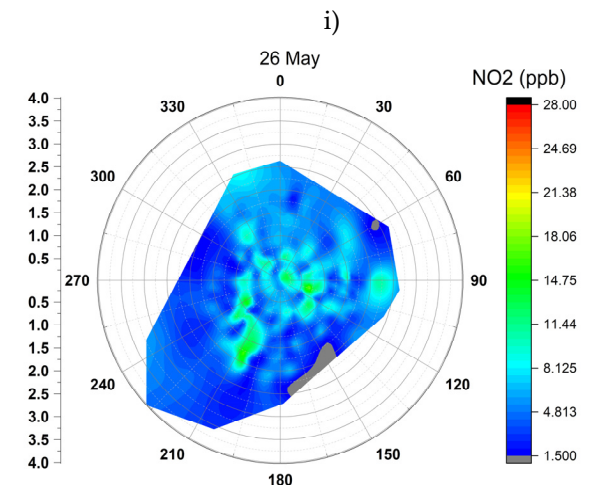

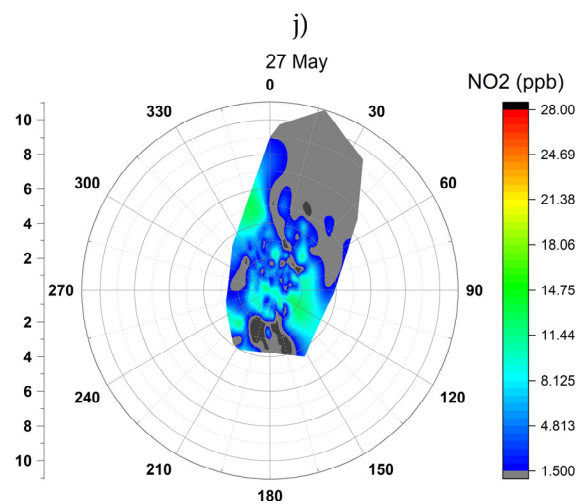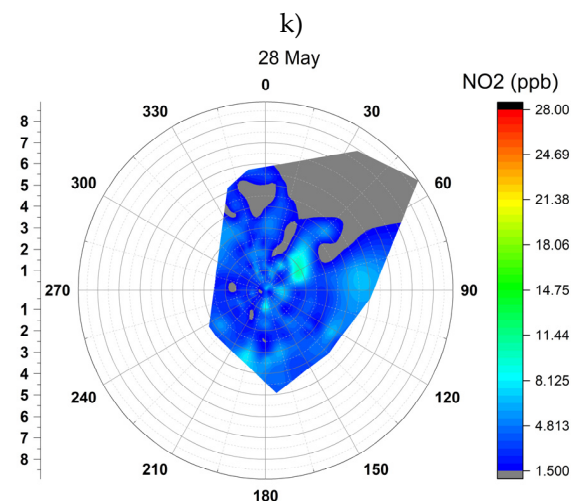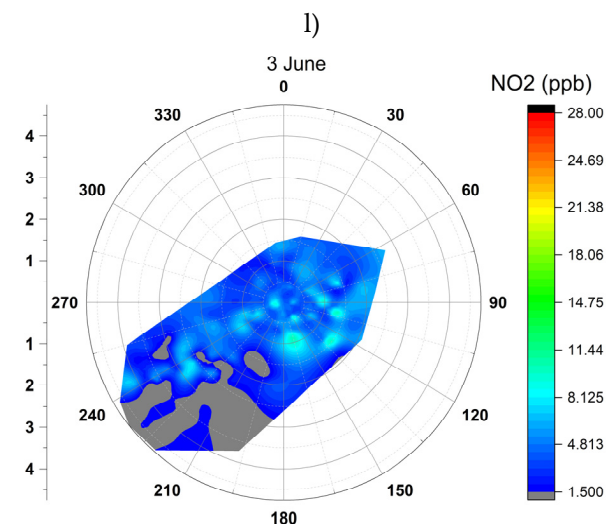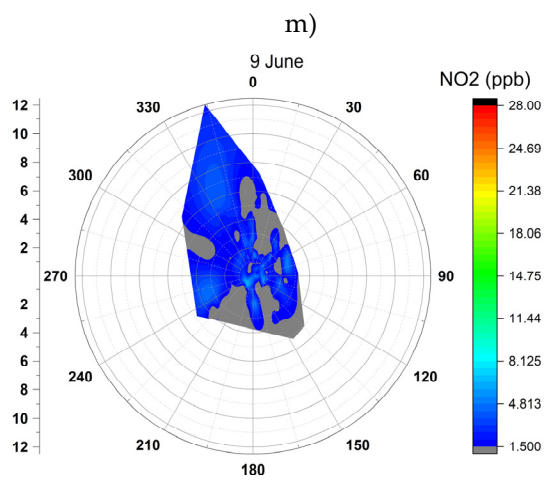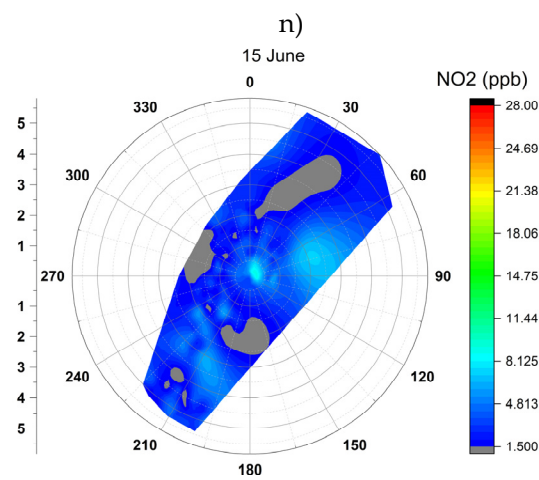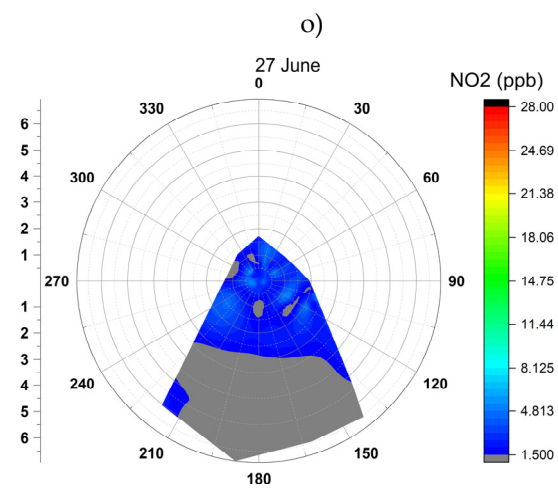

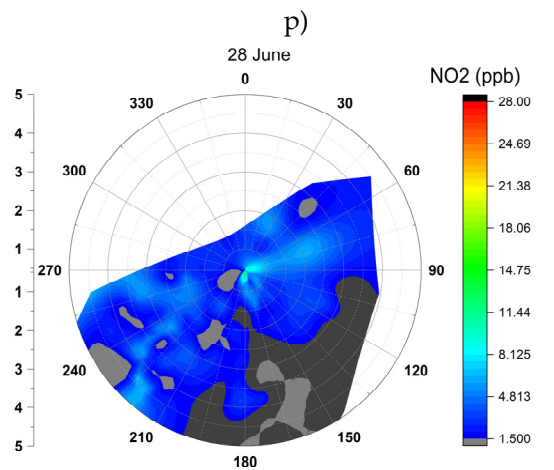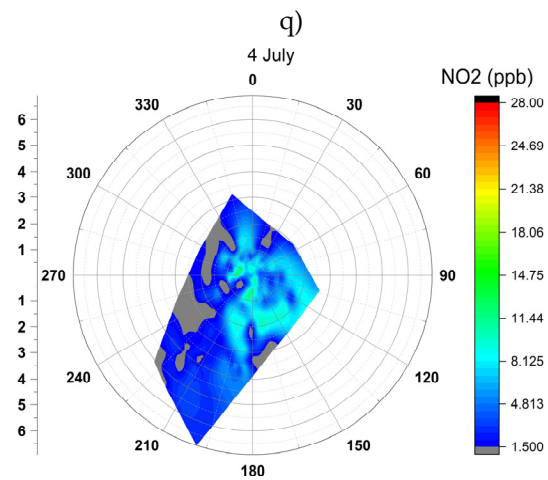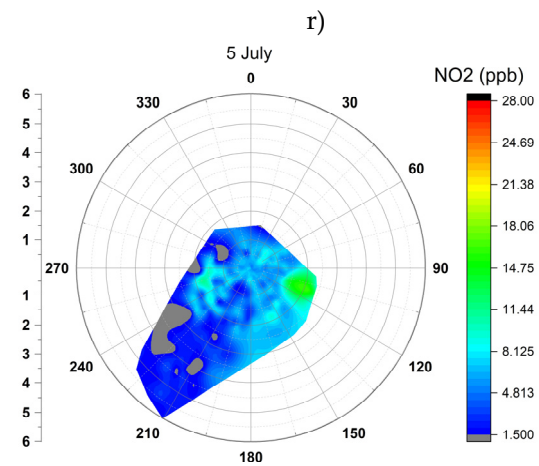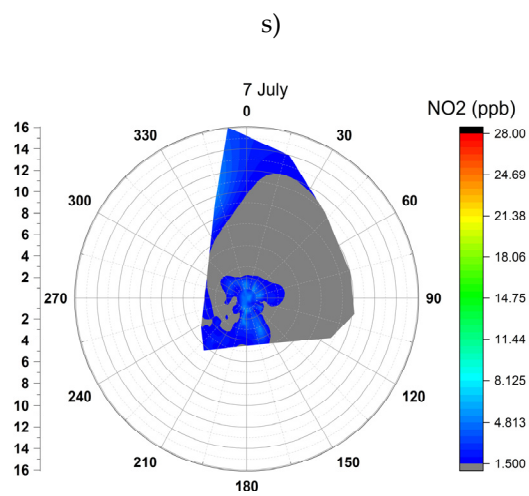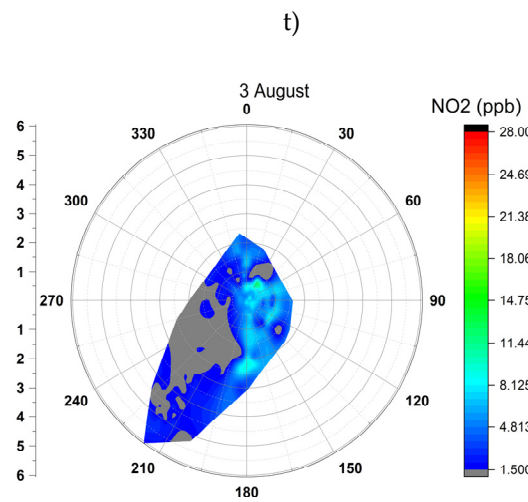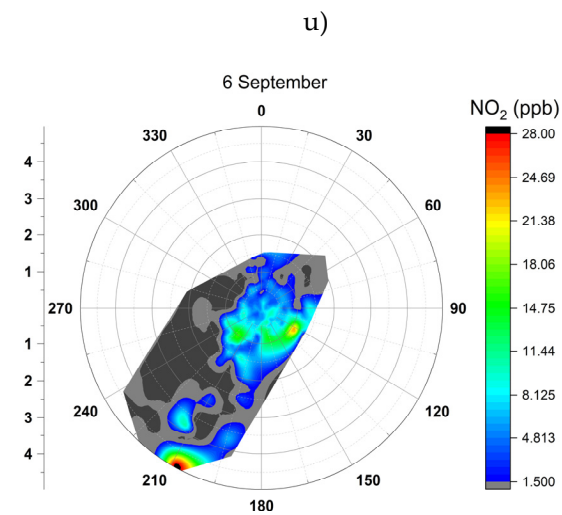



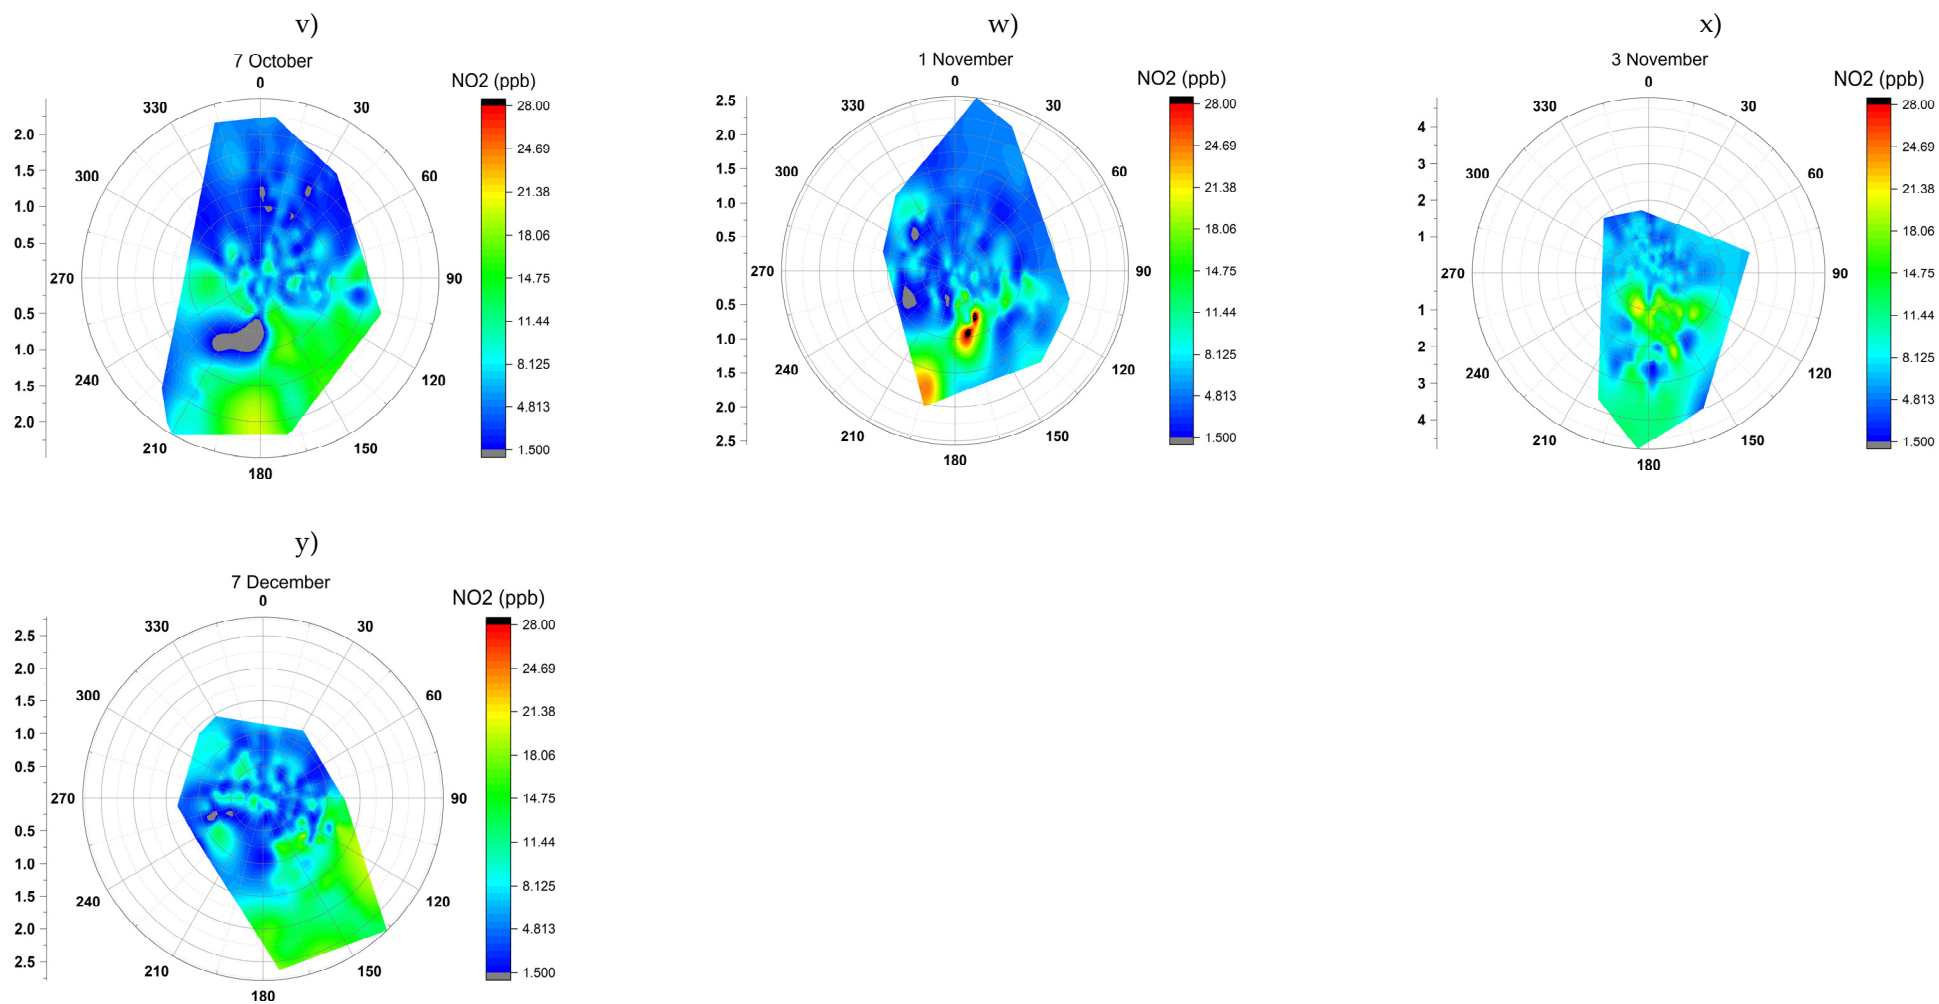

**Figure S4.** NO<sub>2</sub> Bivariate polar plots of the days with HCHO peak occurrence (on left axis windspeed in m/s).

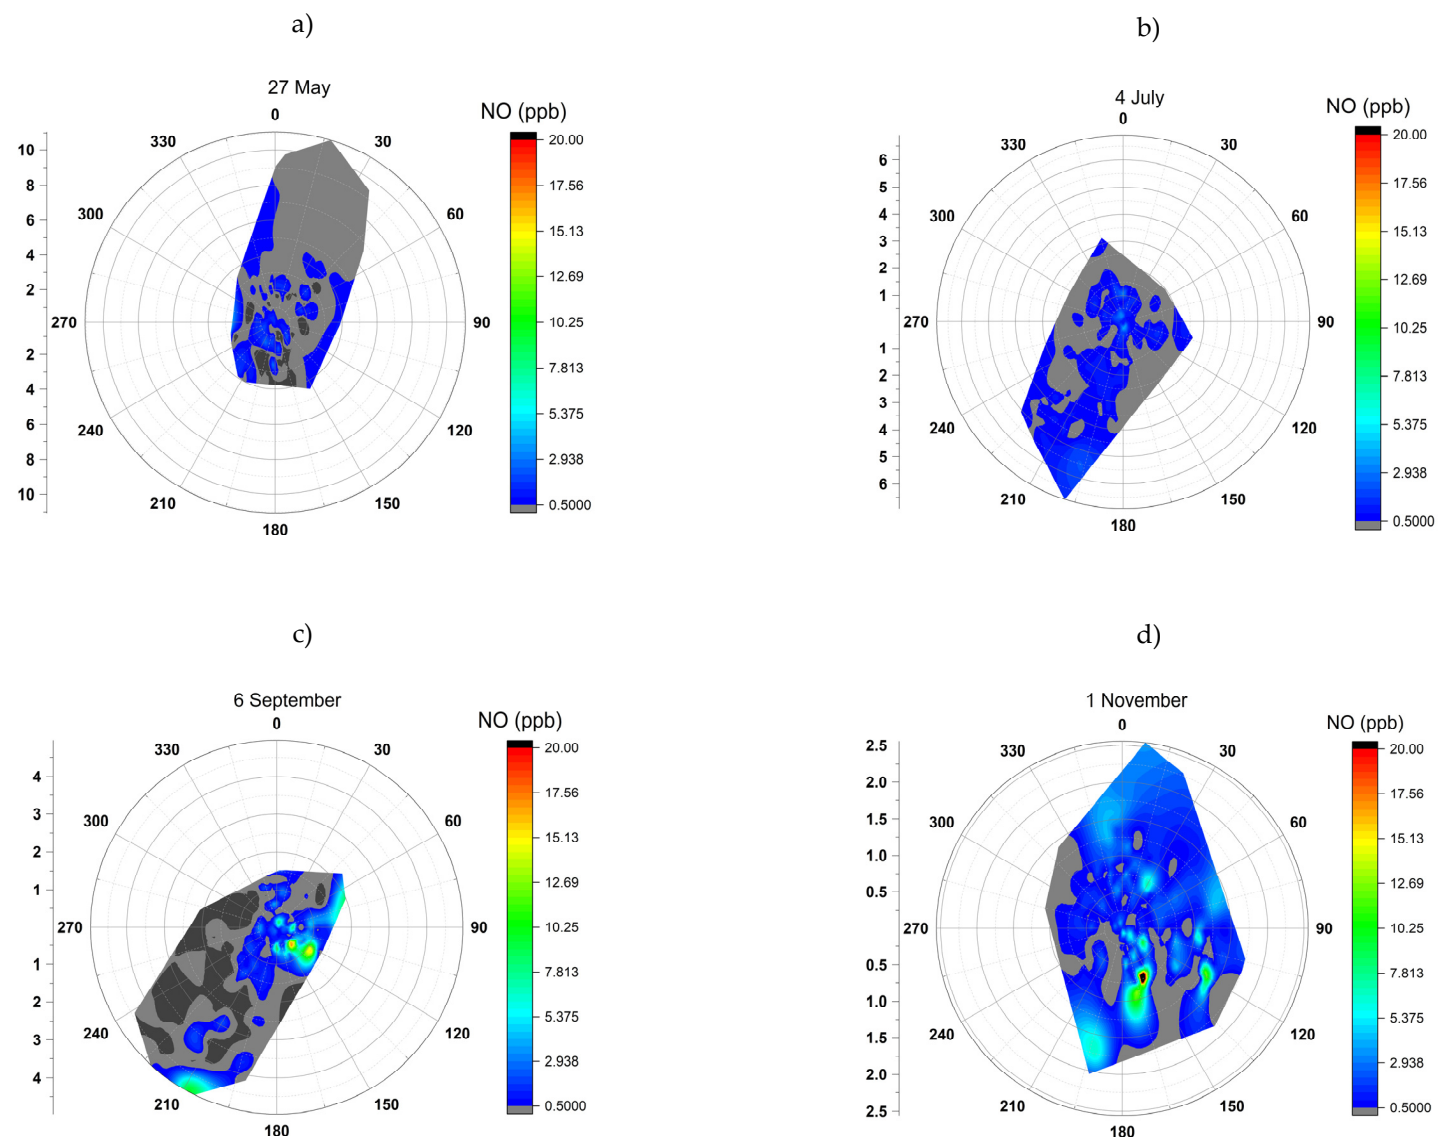

**Figure S5.** NO bivariate polar plots of some of the days with HCHO peak occurrence (on left axis windspeed in m/s) .

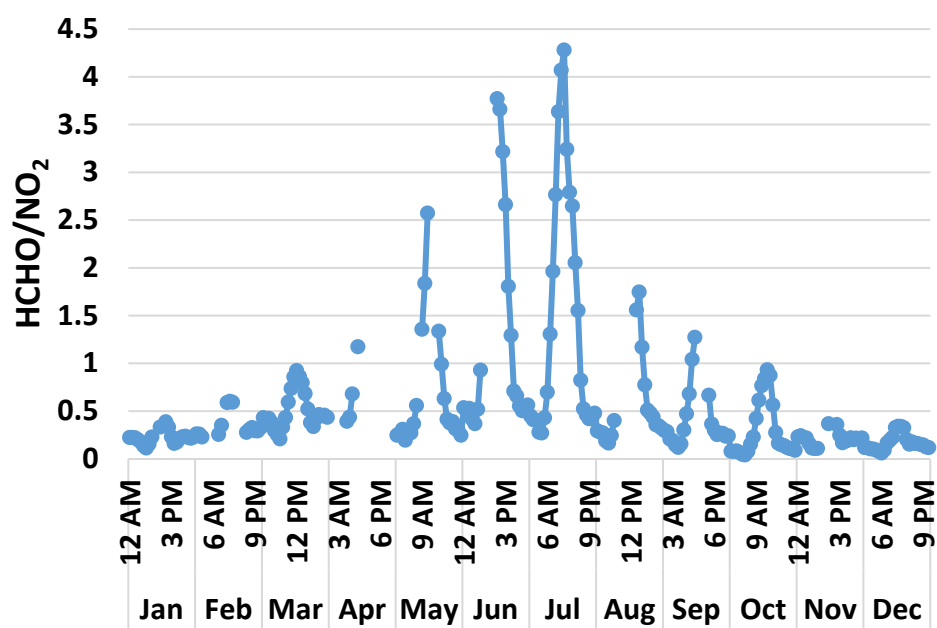

**Figure S6.** Trends of HCHO/NO<sub>2</sub> ratios hourly averages over the different months of the period investigated
